# Supplementary material for: Visión de España y los españoles en la literatura francesa de viajes del siglo XIX: Théopile [sic] Gautier y Alexandre Dumas
Source: Royal Society of Chemistry journal article supplement (doi:10.1039/c5fo01580d), 2003-01-01
Supplement: c5fo01580d1.pdf [file c5fo01580d1.pdf]

Table S1. Effects of nucleotides (NTs) on gut microbial composition in caecum content of the rats. (Mean values and standard deviations, n 6 per group)

| Levels | Bacterium                      | Dextrose control |       | Alcohol control |      | 0.04% NTs |      | 0.16% NTs |       |
|--------|--------------------------------|------------------|-------|-----------------|------|-----------|------|-----------|-------|
|        |                                | Mean             | SD    | Mean            | SD   | Mean      | SD   | Mean      | SD    |
| Phylum | Bacteroidetes                  | 42.4%            | 7.9%  | 50.6%*          | 5.5% | 37.0%##   | 3.0% | 36.7%##   | 7.0%  |
|        | Firmicutes                     | 53.6%            | 9.2%  | 44.8%*          | 4.6% | 57.5%##   | 3.7% | 59.6%##   | 8.6%  |
|        | Proteobacteria                 | 3.7%             | 2.0%  | 4.0%            | 1.9% | 5.2%      | 3.5% | 3.2%      | 1.8%  |
|        | Cyanobacteria                  | 0.2%             | 0.3%  | 0.3%            | 0.2% | 0.3%      | 0.1% | 0.2%      | 0.1%  |
| Order  | Bacteroidales                  | 42.3%            | 8.0%  | 50.0%*          | 4.8% | 36.9%##   | 3.0% | 36.7%##   | 7.0%  |
|        | Clostridiales                  | 47.7%            | 11.6% | 44.2%*          | 4.3% | 56.9%##   | 3.7% | 56.3%##   | 10.9% |
|        | Lactobacillales                | 3.5%             | 4.3%  | 0.1%**          | 0.1% | 0.2%      | 0.1% | 0.3%##    | 0.1%  |
|        | Erysipelotrichales             | 2.9%             | 3.8%  | 0.9%*           | 1.0% | 0.4%      | 0.4% | 3.0%†     | 3.7%  |
|        | Desulfovibrionales             | 1.0%             | 1.2%  | 0.5%            | 0.3% | 0.4%      | 0.2% | 1.0%†     | 0.6%  |
|        | Campylobacterales              | 2.3%             | 1.4%  | 3.1%            | 1.6% | 4.6%      | 3.5% | 2.0%      | 0.5%  |
| Genus  | Bacteroides                    | 10.8%            | 5.4%  | 11.6%           | 5.4% | 7.5%      | 3.2% | 2.0%##†   | 1.4%  |
|        | Blautia                        | 9.3%             | 6.7%  | 17.6%*          | 3.8% | 7.0%##    | 6.6% | 12.0%     | 6.8%  |
|        | Helicobacteraceae_norank       | 2.3%             | 1.4%  | 3.1%            | 1.6% | 4.6%      | 3.5% | 0.2%##††  | 0.4%  |
|        | Lachnospiraceae_incertae_sedis | 6.0%             | 13.7% | 0.4%            | 0.1% | 6.7%##    | 4.3% | 0.5%      | 0.2%  |
|        | Lachnospiraceae_unclassified   | 3.2%             | 3.4%  | 2.5%            | 1.4% | 8.8%##    | 5.8% | 6.0%#     | 4.1%  |
|        | Lachnospiraceae_uncultured     | 1.6%             | 1.7%  | 1.5%            | 0.8% | 1.5%      | 0.8% | 1.7%      | 0.6%  |
|        | Lactobacillus                  | 2.9%             | 4.1%  | 0.1%**          | 0.1% | 0.1%      | 0.1% | 0.3%      | 0.2%  |
|        | Oscillibacter                  | 4.6%             | 3.9%  | 5.8%            | 2.4% | 9.1%      | 1.2% | 4.8%      | 2.3%  |
|        | Ruminococcaceae_incertae_sedis | 1.6%             | 0.9%  | 1.6%            | 0.5% | 1.4%      | 0.4% | 3.3%      | 2.2%  |
|        | Ruminococcaceae_unclassified   | 5.3%             | 3.1%  | 3.1%*           | 0.8% | 5.3%#     | 1.9% | 4.7%      | 1.6%  |
|        | Ruminococcaceae_uncultured     | 9.3%             | 4.0%  | 5.2%            | 2.7% | 9.6%      | 2.6% | 9.5%      | 5.3%  |
|        | S24-7_norank                   | 29.9%            | 6.4%  | 35.5%           | 7.0% | 28.4%     | 2.9% | 29.9%     | 9.1%  |

Mean values were significantly different from those of the dextrose control group: \* $p < 0.05$ , \*\* $p < 0.01$ .

Mean values were significantly different from those of the alcohol control group: # $p < 0.05$ , ## $p < 0.01$ .

Mean values were significantly different from those of the 0.04% NTs group: † $p < 0.05$ , †† $p < 0.01$ .
